# Supplementary material
Source: Springer Nature journal article supplement (https://www.springermedizin.de/resource/supplementary/12955_2007_372_MOESM5_ESM.pdf/9560266)

Item: crying [CES17] - 2 Levels for Person Factor: GENDER

Slope  
0.39

Expected Value

× male  
○ female

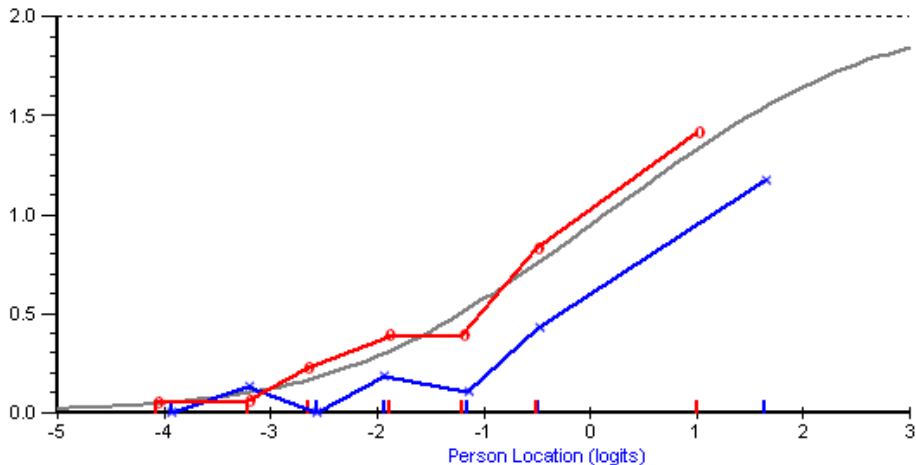

Supplement: MOESM5 [file 9560266]
